## PUBLISHER'S NOTE

# Publisher's Note: Modulation of dorsal root ganglion development by ErbB signaling and the scaffold protein Sorbs3 by Malmquist et al. Development doi:10.1242/dev.084640

### Olivier Pourquié

Editor in Chief, Development (dev@biologists.com)

This Publisher's Note relates to the article 'Modulation of dorsal root ganglion development by ErbB signaling and the scaffold protein Sorbs3' by Malmquist et al. (2013).

A Correspondence article in Development (Bostaille et al., 2017) has identified the causative mutation for the *ouchless* phenotype and demonstrates that this mutation is associated with the *adgra2* gene, rather than the *sorbs3* gene as reported by Malmquist et al. (2013). We refer the reader to the Correspondence article for further details.

The senior author of Malmquist et al. (2013), David Raible, is an author on the Correspondence and investigations are currently ongoing in the laboratory to reassess the results and conclusions presented in this paper. Development is publishing this note to make readers aware of this issue, and we will provide further information once Dr Raible and colleagues have completed their analysis.

This course of action follows the advice set out by COPE (Committee on Publication Ethics), of which Development is a member.

### References

- Malmquist, S. J., Abramsson, A., McGraw, H. F., Linbo, T. H. and Raible, D. W. (2013). Modulation of dorsal root ganglion development by ErbB signaling and the scaffold protein Sorbs3. *Development* **140**, 3986-3996.
- Bostaille, N., Gauquier, A., Stainier, D. Y. R., Raible, D. W. and Vanhollebeke, B. (2017). Defective *adgra2* (*gpr124*) splicing and function in zebrafish *ouchless* mutants. *Development* **144**, 8-11.
